# Supplementary material for: Noninvasive detection of tumor-infiltrating T cells by PET reporter imaging
Source: JCI journal article supplement (doi:10.1172/jci77326), 2015-03-29
Supplement: sd1 [file 1]

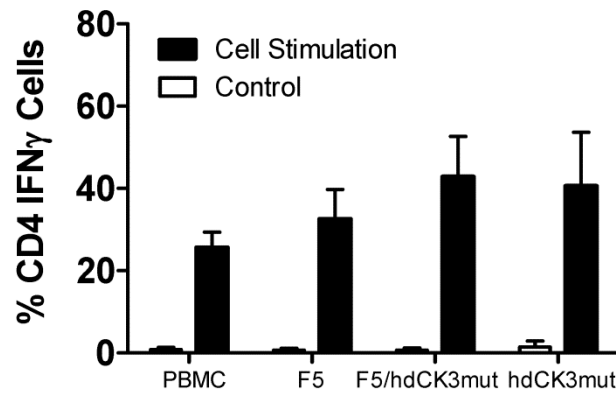

**Supplemental Figure S1: hdCK3mut expressing CD4 T cells are capable of IFN- $\gamma$  cytokine production.** Percentage of CD4 cells that produce IFN- $\gamma$  shown as mean with +/- SD. (n=4)

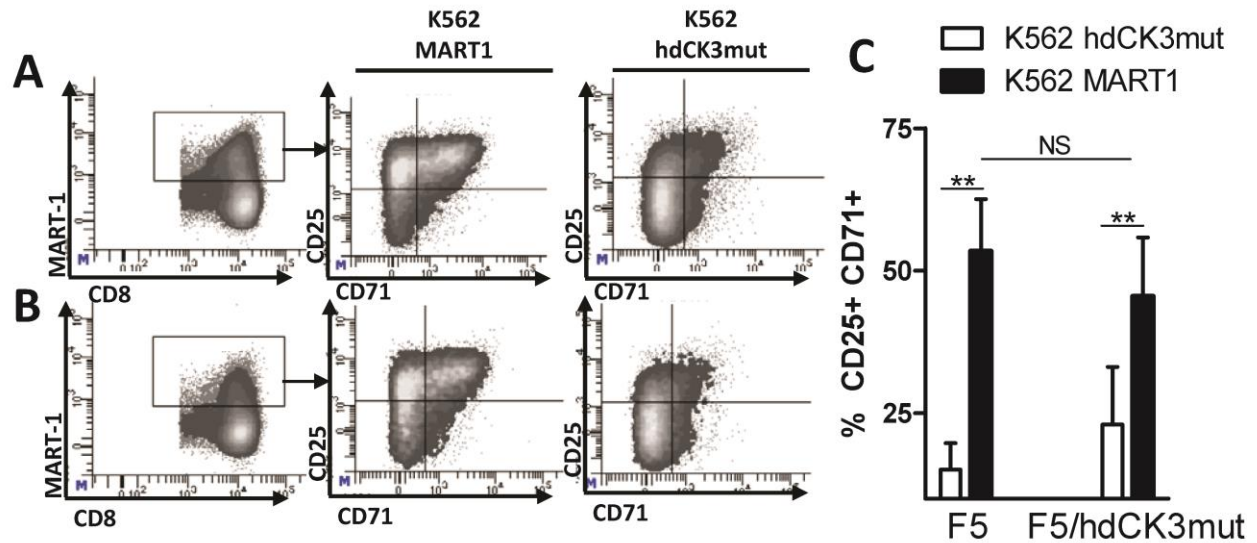

**Supplemental Figure S2: Expression of hdCK3mut does not alter T cell activation.** aAPC (K562) and transduced PBMC T cells were co-cultured for 72hrs. Representative flow cytometry plots from T cells expressing F5 (A) or F5/hdCK3mut (B) co-cultured with MART-1 expressing aAPCs or hdCK3mut. First panel gated showing F5 T cells, activated F5 T cells are detected after 72hr coculture with aAPCs (CD25+, CD71+) expressing MART1-second panel, or hdCK3mut-third panel. (C) Quantification of activated F5 T cells. White bars are cells cultured with hdCK3mut aAPCs, black bars are cells cultured with MART-1 aAPCs ( $P < 0.005$  for differing aAPCs or NS by T test for F5 and F5/hdCK3mut) shown as mean +SD (n=4).

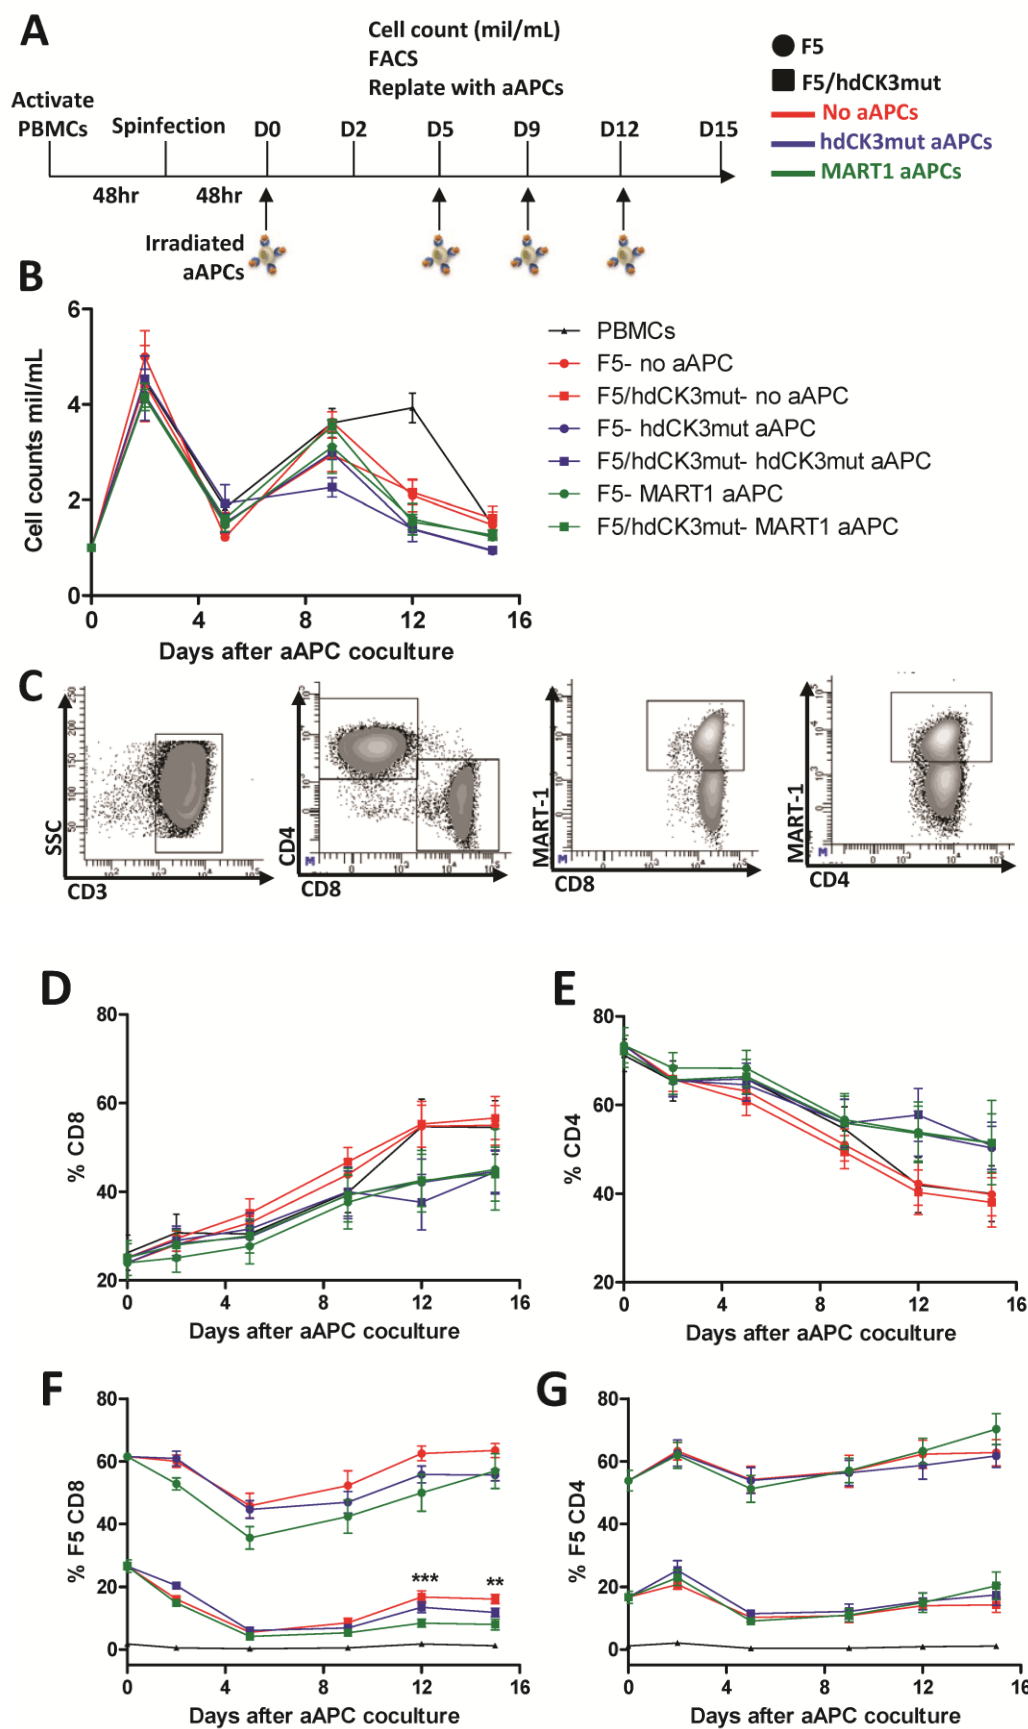

**Supplemental Figure 3: Repeated aAPC coculture with F5 or F5/hdCK3mut PBMCs. (A)**

Schematic of experiment. PBMCs were activated 48hr, infected and analyzed 48hr after. Total PBMCs were counted and plated at  $1 \times 10^6$  cells/mL with irradiated aAPC plated at 5:1 T cell:aAPC. Time points of analysis indicated as days after initial aAPC coculture. (B) Total cell counts in million/mL. Black-mock PBMCs, Red- no aAPCs, Blue- hdCK3mut aAPCs, Green- MART1 aAPCs, Circles- F5 transduced, Squares- F5/hdCK3mut transduced. NS by Two-Way ANOVA. (C) Representative FACS plots of transduced PBMCs. Initial gating on CD3, then CD4 or CD8 with F5 TCR identified by MART-1 tetramer. Total percentage of CD8 (D), CD4 (E), F5 CD8 (F), and F5 CD4 (G) are displayed over time. Statistics calculated by Two-Way ANOVA. N=3 unique PBMC donors.

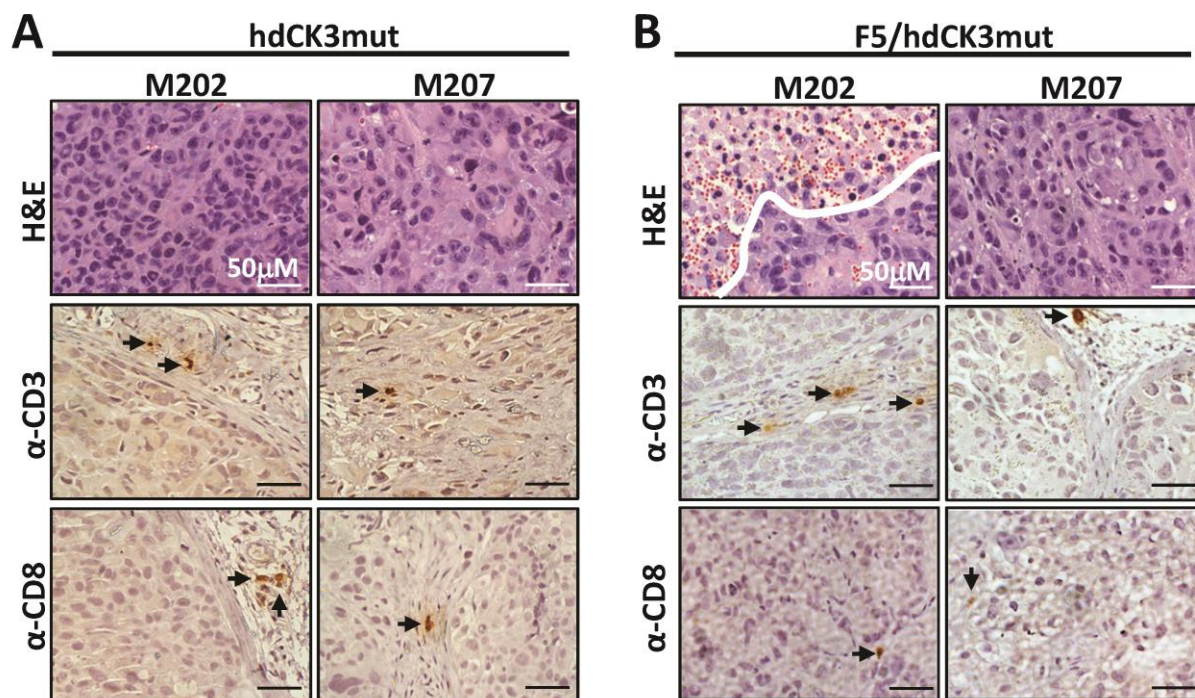

**Supplemental Figure S4: IHC of M202 and M207 Tumors from hdCK3mut and F5/hdCK3mut recipient animals.** (A) H&E, α-CD3 and α-CD8 from representative sections of M202 (HLA-A\*0201+) and M207 (HLA-A\*0201-) xenografts from hdCK3mut recipients. (Scale bar is 50μM) (B) Additional IHC of M202 and M207 Tumors from F5/hdCK3mut recipient animals. H&E from M202 (HLA-A\*0201+) and M207 (HLA-A\*0201-) a white border is drawn to distinguish viable tumor from tumor necrosis. α-CD3 and α-CD8 from representative sections of M202 or M207 xenografts. Black arrows point to T cells. (Scale bar is 50μM)

**A**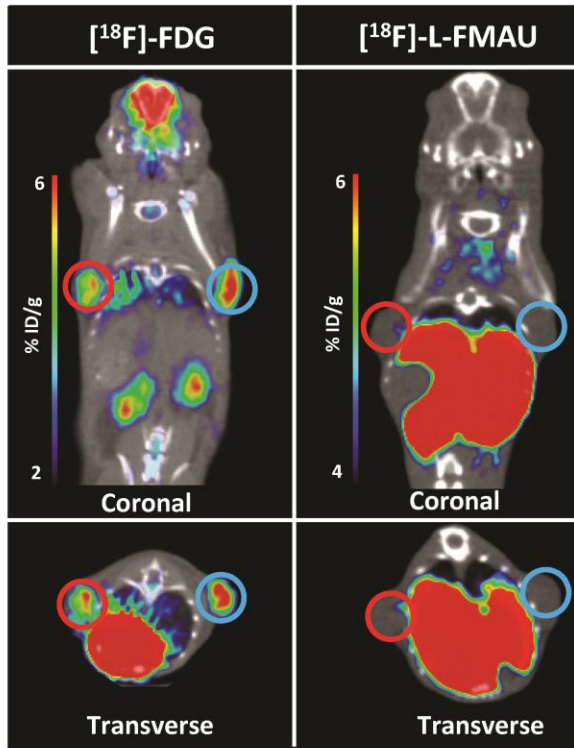**B**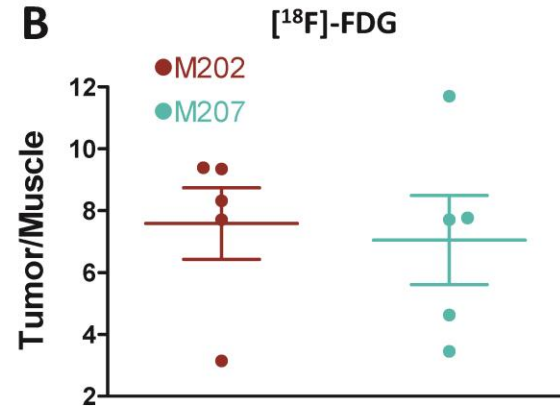**C**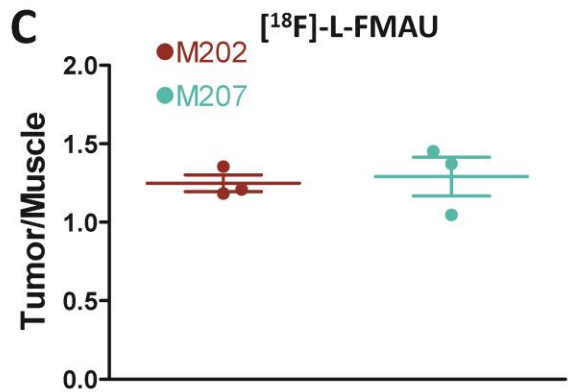

**Supplemental Figure S5: Engraftment and PET imaging of melanoma xenografts M202 and M207 in control NSG recipients.** (A) [18F]-FDG and [18F]-L-FMAU images from NSG animals implanted with M202 and M207 xenografts. M202 xenografts are circled in red with M207 xenografts circled in aqua. (B) Quantification of the tumor/muscle ratio from [18F]-FDG images (NS by T test) shown as mean  $\pm$  SD (n=5). (C) Quantification of the tumor/muscle ratio from [18F]-L-FMAU images (NS by T test) shown as mean  $\pm$  SD (n=3).

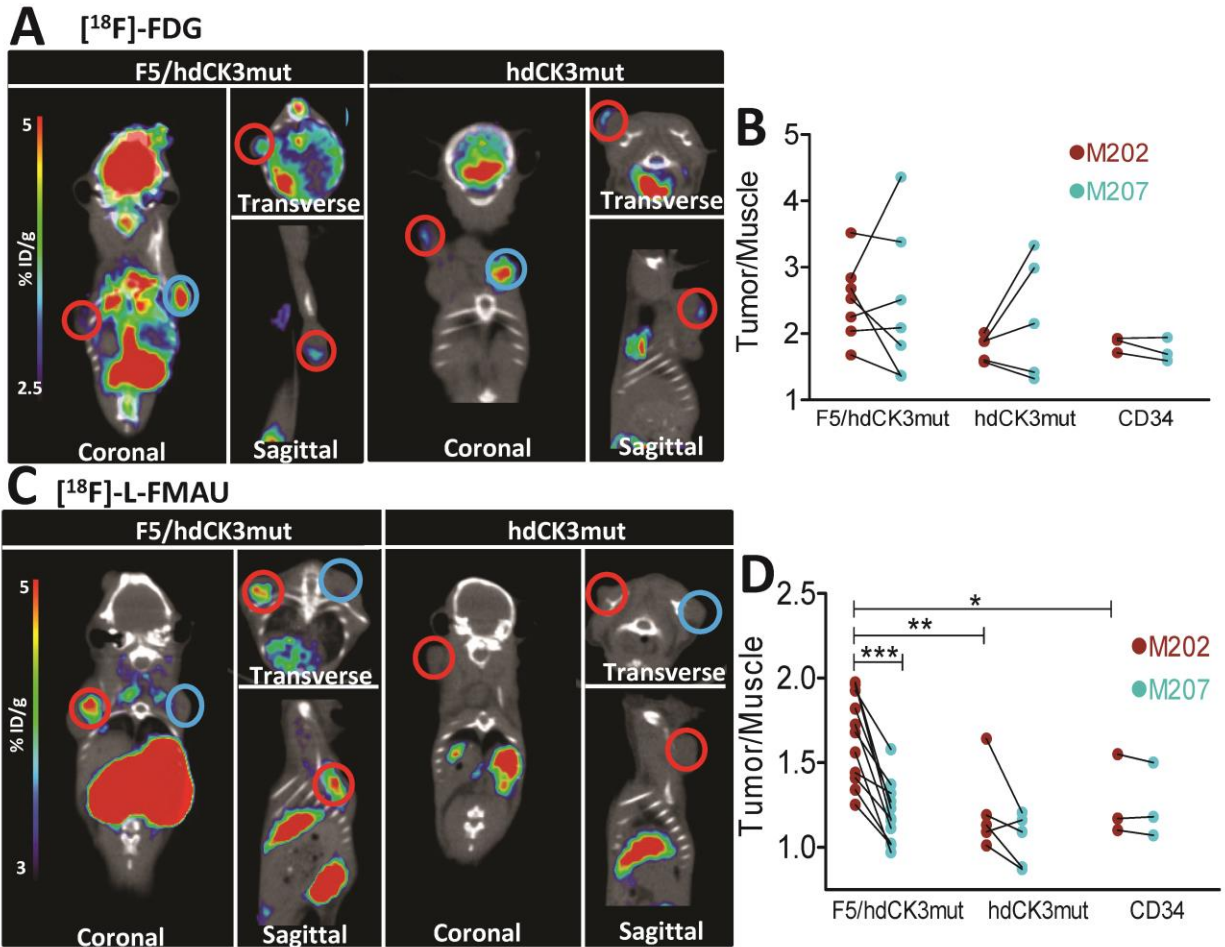

**Supplemental Figure S6: Additional PET images from BLT animals.** (A)  $[^{18}\text{F}]\text{-FDG}$  scans from F5/hdCK3mut and hdCK3mut recipient animals. M202 tumors are circled in red, M207 tumors are circled in aqua. (B) Quantification of  $[^{18}\text{F}]\text{-FDG}$  scans. Matched tumors are connected by black lines. (C) Additional  $[^{18}\text{F}]\text{-L-FMAU}$  scans from F5/hdCK3mut and hdCK3mut recipient animals. M202 tumors are circled in red, M207 tumors are circled in aqua. (D) Quantification of  $[^{18}\text{F}]\text{-L-FMAU}$  scans. Matched tumors are connected by black lines. (n=3 to n=11) Statistics by one way ANOVA.



|        | F5/hdCK3mut |       | hdCK3mut |       | CD34    |       |
|--------|-------------|-------|----------|-------|---------|-------|
|        | #           | Mean  | #        | Mean  | #       | Mean  |
| Probe  | animals     | Diff. | animals  | Diff. | animals | Diff. |
| FDG    | 4/7         | 0.09  | 2/5      | -0.32 | 2/3     | 0.04  |
| L-FMAU | 11/11       | 0.44  | 4/5      | 0.17  | 2/3     | 0.02  |

**Supplemental Table S1: Difference in M202/M207 signal in BLT recipient animals.** Mean difference is average fold change in M202 subtracting average fold change in M207.
